# Supplementary material for: Regulatory Potential of Long Non-Coding RNAs (lncRNAs) in Boar Spermatozoa with Good and Poor Freezability
Source: MDPI journal article supplement (doi:10.3390/life10110300), 2020-11-21
Supplement: s1 [file s1]

A

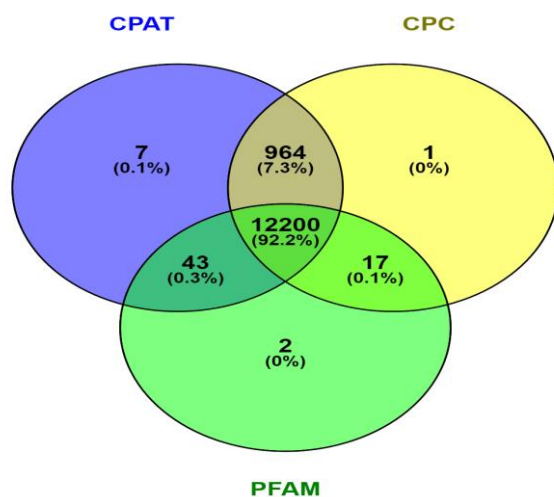

B

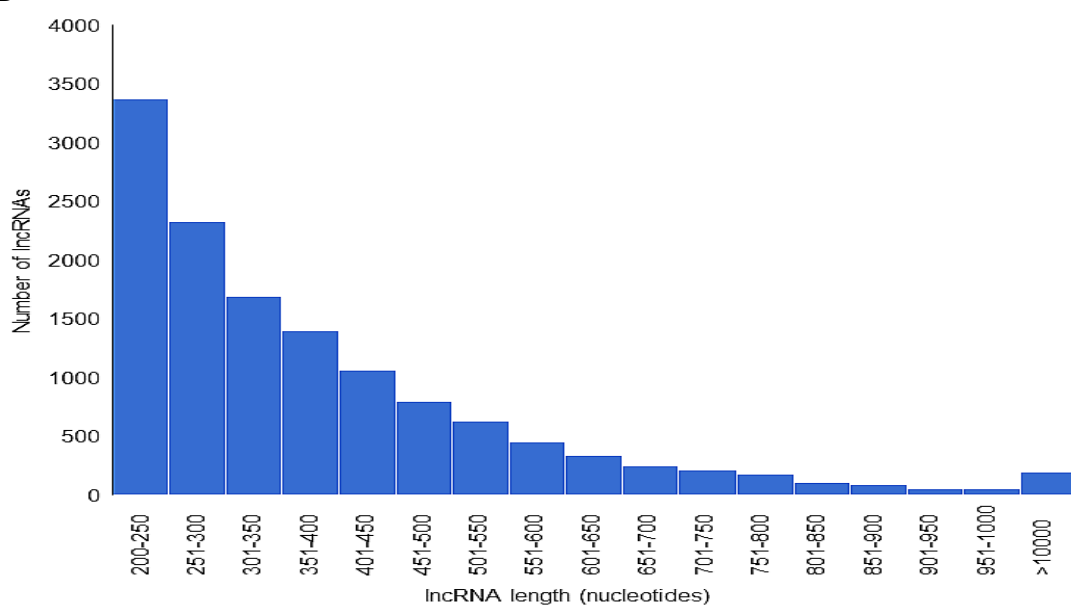

C

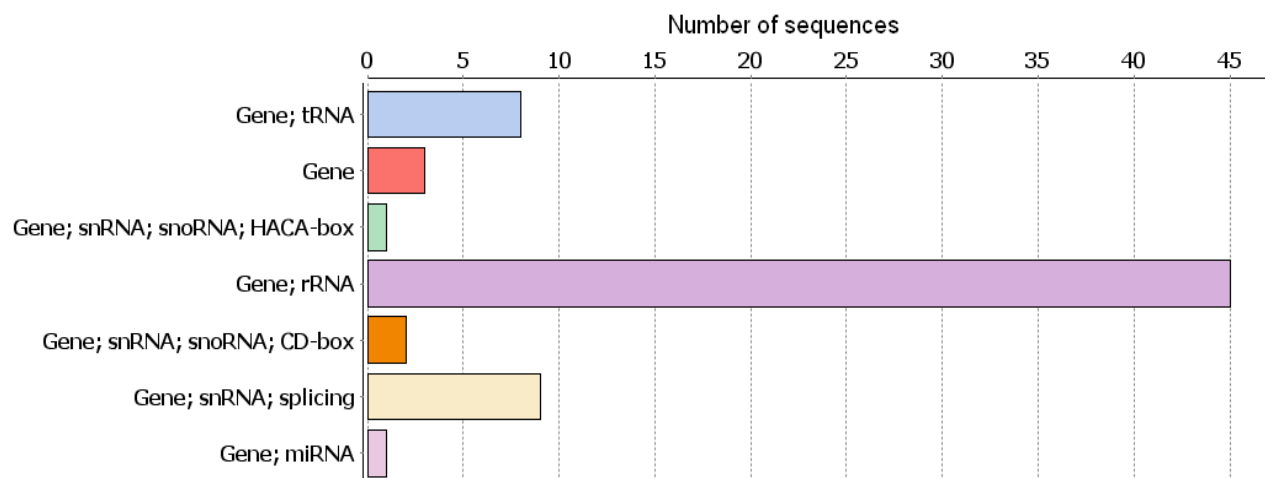

**Supplementary Figure S1.** Splicing features of long non-coding RNAs (lncRNAs) of boar spermatozoa. (A). Venn diagram showing overlapping and non-overlapping splicing isoforms of lncRNAs. (B) Distributions of lncRNAs with length for BLAST sequences. (C) Rfam distributions of biotype sequences detected in lncRNA splicing isoforms.
